# Supplementary material for: Genomic and Transcriptomic Analysis Provide Insights Into Root Rot Resistance in Panax notoginseng
Source: Front Plant Sci. 2021 Dec 15;12:775019. doi: 10.3389/fpls.2021.775019 (PMC8714957; doi:10.3389/fpls.2021.775019)
Supplement: Supplementary file 2 [file Table_2.XLSX]

## Sheet: Sheet1
Supplementary Table 2. Protein sequences used in this study
Name	sequeces
>CsWRKY1	MEAQQALATIDDDRVQSTGEGDDKQASPNPKQHIHLKVPSMGDLEKPSMENLSVPSASNSITWKEEDDEQRHEERMKRTKVEMREVKEENERLKKYLDEIMKDYETLKRKFHEIKNNHDDQIREEGKKSTQTSGSTINNNNNDNDDDHQVEAEVDDMVSLRLGSRFSTHHQNKNTSSSSLSLTNKILDLKQDYVIQTPSTIDHSIHSPTHSEPKDQEEAGQTTWPPSKMPKPGGLPSPATGEDEVSQQNPPKKARVCVRARCDTPTMNDGCQWRKYGQKIAKGNPCPRAYYRCTGAPTCPVRKQVQRSVDDISILITTYEGTHNHPLPVSAMAMASTTSAAASMLLSGPSSSTSSQPGLNHSFTAPATAANLHGMNMYLSNNTNSKQFYLPNSSMLSSS…
>CsWRKY10	MASFPYEDSNLNPNPNPNNYTHFPPILDPASFFDFELSDFLLFGDDNNIVVDQVASSSPSMTSSEKITSGGVDSGGSSTVIDTGSSVVVSSSGASTTSIRSKNGEKKRKGEMGCRVAFRTKSEQEIMDDGYKWRKYGKKSVKNSPNPRNYYKCSSEGCNVKKKVERDREDANYVITTYEGIHNHESPFVVYYNQLPSFTSASTPT
>CsWRKY11	MGSKSQVMLNPQALLEDHQEVTPNSQMGFFNFPSNLTFFQLPSIPQTHSPSPSFDPPNFSTSNNNTNNNNNSNNLSETLLSSSILPLKSSISYELAPQHLLSLQTSTPNLWPWGEIGERLLMNGKRSNNNENYNNQLGVSKMKMKKMKGRRKVREPRFSFKTMSDVDVLDDGYKWRKYGQKVVKNTQHPRSYYRCTQDHCRVKKRVERLAEDPRMVITTYEGRHVHSPSHDSEDSEAQTHLNNFFW
>CsWRKY12	MEPTSTTINTSLDLNFNPPADQPHPPTPNSPLKQQAPTGILAEKLNRISSENKKLNQMLGVVVENYSVLKNQVIDLIMKTRKRKAAPGCDNCCNFNRSASSDQYCGCCSDDNDSCYNKRPRENNSKPKVMRVLVPTPVSDSTLIVKDGYQWRKYGQKVTKDNPSPRAYYKCSFAPTCPVKRKVQRSVEEPCYLVATYEGQHNHPKPNSGIEYQLIGPINLGSNTKLDSSNVTSSPSSSIKSPSSSSLMPSMSFDHLTKSQPQIRSPSSSNSSSSTQKLLVQQMATLLTRDPNFTRALATAITGNMVDSEIWG
>CsWRKY13	MDSKVECLQTELEKLRKENEALKLMLKVVSIKNLVSQVDVCSRDHRHDQNDEGSRSERANLKVSPPALALALETSSTTQAYARTTFKDQALMVKDGYKWRKYGQKITKDNQSPRAYFKCSSPGCPVKKKVQRSLENKSMVIVTYDGHHNHNHNHENASPPPLSSSQRGSSSSPPLPVETNRVALPMSLNLDLTLSRHADDHKL
>CsWRKY14	MDNSYKNFFPTSSSSFFHNSLAMDEEEDDELEEERSLKKVKSEESGGELKKKKKIRKRRFAFETRSQVDVLDDGYRWRKYGQKAVKNNKFPRSYYKCSNEGCKVKKQIQRLTNDEGVVLTTARGLVKGMVGPLHGEAMTGSRSKITPTTSNASLCSSHISFTVHHQERALMAPSNHRVVHDQAMNNVHEATLWNLYGVGVDEHIDRKASLYISSVQERFKLEGLIN
>CsWRKY15	MAVELLSGFTNAPQLSSRSPMDQDSAVQEAASGLDTLKKLVTLLSHSPPSNLDSDCQAVANAAVSHFRKAISLLGRSSRTGHARFRRAPLDSSKIYNATPIQQIPPPSLDRLDSATTINFSYSTAPTSSFLTSLPASDSEIKLQHQPSSSSFQITDLSRVSSVVSKPSSGLKRKCGSENLGSGKCAGSSGGRCHCSKKRKLRLKRVVRVPAISSKNADIPPDDYSWRKYGQKPIKGSPYPRGYYKCSSLRGCPARKHVERASDDPSMLIVTYEGDHNHSQSVAEASSLILESW
>CsWRKY16	MGRTDDNIAIIGDWVPPSPSPRTFFSAMQMLGEDIGSKPSMDTTTISDHKTEELFLRPREQTVSENAFARGGIPGVNSGDRGMEFSTFSEQKFRGGLVERIAARAGFNAPRLNTESIRSTDHSLNSEVKSPYLTIPPGLSPTTLLDSPVFLSNSLAQQSPTTGKFPFLPNVCISRSSTMMSEANNKGNNNLFDDNNTSFAFRPSVESGSSFFLNAASKTASATILPQSCPRIEVPVPRSENSFQSHRVEPSLSLPQNRIGHHPQVGLSTTYVEKDNGGKAVSEEQRPFDSLGGGSGGSGEHSSPLDEQLDEGEQRGSGDSMAGGACGTPSEDGYNWRKYGQKQVKGSEYPRSYYKCTHPNCQVKKKVERSHEGHITEIIYKGTHNHPKPSPNRRGAIGS…
>CsWRKY17	MDPTDSDLPDPSNASSGAKYKLLSPAKLPISRSPCITIPPGLSPTSFLDSPVLLTNLKVEPSPTTGSFTKLPMAHDSSGSAIYPMTSMAFSNTNASDEGRSNYFEFKPYVGPNMVPADLSHRKGEQFSEVQGQPQPFTAPPMTKMEISVMSNDLSRSTQMDTHTVASGVSVPEANGDEINHSLNTNSRVQAPQSDPKGSGIPVVSDRLSDDGYNWRKYGQKHVKGSEFPRSYYKCTHPNCEVKKLFERSHDGQITDIIYKGTHDHPKPQPSRRYSASASMNVQEDGTDKPSSLPGQDDRSCSMYAQTMHTIEPNGTTDPSMPANDRITEGAGTTLPCKNHDEVDDDDIYLKRRKMELGGFDVCPMVKPIREPRVVVQTLSEVDILDDGYRWRKYGQKVV…
>CsWRKY18	METGTQTQRSSGRGEDYEVQVSFHLSNDPHHIHEMGFVQLEEHSQVLSFLAPNNNNNTTNMPPPPFTTTSPHSNILPRPPSWTNHQLPGTLDPKPGNDENCTATATDATNSWWRNTNADKSKVKVRRKLREPRFCFQTRSDVDVLDDGYKWRKYGQKVVKNSLHPRSYYRCTHSNCRVKKRVERLSEDCRMVITTYEGRHNHTPCDDSNSSEHEPFTSF
>CsWRKY19	MEIMEHNSLISELTQGKELALQLRTHLHPSSSPEQACLFLTEMIQSSFEKALLLLNFNSSNLKTHQISSLDEQEGEEEEEEEEEVEESSTKKKRKISRSRDALKKRKLLPRWTEEIKVCNGSAPEGPLNDGYSWRKYGQKDIHGANFPRCYYRCTHRNVRGCLATKQVQKSDNDPNIFEVTYRGRHTCNQSSNLGSTSISSQNQIYEETNQIQQKPNSEIWFDFGDNNFNLKTEDFDQVFPPFSFSYEEPIMNPTFIPGEDLTAAVSSPATDTAWDWSGYDGGVQRVQSSEQSAVTEIVSATTSVTNSPIYNGDWDFSLDNIDFDHNFPFDSLDFIS
>CsWRKY2	MASSSGSLDTSANSHPSFTFSTHPFMTSSYSDLLASANIDPPSSAPLRASTTGVPKFKSLPPPSLPLSPPPMSPSSFFAIPPGLSPAELLDSPVLLSASHVLPSPTTGTFPSHSLNWKSNFGYNQQNIKEENKYSSNFSFQTQSSKLPPTSFQPSSTIAPTTQGWSFQEQRKKEDSFSSEKNMVKPEFGSMRSFSPEYGVVQNQSQNNGSGELRSDYGNNYPQQSQTVNRRSDDGYNWRKYGQKQVKGSENPRSYYKCTFPNCPTKKKVERSLDGQITEIVYKGSHNHPKPQSTRRSSLSSAGSSQAIVALNQAANEMADQSFTTQGSGQFDGVATPENSSISIGDEDFDRSSQKSKSGGDDFDEEEPEAKRWRREGDNNEGISAAGSRTVREPRVVVQ…
>CsWRKY20	MEEENHQLQHPPPLLFPSLPCSDPLATSLEIDWIAVLSGQEATRDLPPTSSTCESLERRRDEEKSNQRKKGGRQRRKAVGRRRFEFQTRSTEDILDDGYRWRKYGQKAVKHSLHPRSYYKCTYVTCNVKKQVQRLSKDRSIVVTTYEGIHNHPSHILMQTLTPLLKQIHTSFPLSKLFMNY
>CsWRKY21	MEVDWDLHAVVRGYSAAPSAATIVPASSSSSSSSSSSNNPVVPFSFGRDLTNNQMKNHFFSLQDPFQPSNCNSTQELHELFKPFFPKSQPSPSPPPPPPAPPAPSLLSSPPAPKILTHQKQSTHLPKQLHSTSASAPRSKRRKNQLKKVCQVPAESLSSDIWAWRKYGQKPIKGSPYPRGYYRCSSSKGCMARKQVERNRSDPGMFIVTYTAEHNHPAPTHRNSLAGSTRQKPITPSTTASGSEKLDPKQPVCSSEEQSTITESKEEKEELLMAEDEEDDDLGISDLIVNDDFYVGFEELDSPITDDCFSDPFPANFDLPWLFNGNPDGEIVKLPC
>CsWRKY22	MEKKFEEESRMGFDDSAGFYSPAVFSDDFPSSNFDSFSSIFDMPCDAHKASNFDFYYYNNNNSNSNNNPSSFFDLLSTAAPPLSSPASTVPESSEVVNAPTTPNSSSVSSSSNEAAAIEEVNNSTTTHDKPSASKVLKPIKKNQKKQREPRFAFMTKSDIDHLDDGYRWRKYGQKAVKNSPYPRSYYRCTTAGCGVKKRVERSSGDHTIVVTTYEGQHTHQSPIMPRGSLRVLPESTNNSLTVDHDTTATGLLFQHNTSQPFMYIAPPPPFLTINSSSVAASHNPPPISFQPPSPQASVRDHGLLQDLVPLQMRKEPKDEQNG
>CsWRKY23	MEIDLSLKIDHHKEEHHHHHLIKHQKNDQQQRQDDHDREEEGEGEGEEEEEEEEEEEEEIDIDHHVVPSTTSGLKVFLPHNNTNVGEISELQMEMDRIKEENKALRKAVEQTMKDYYDLEMKIGFFQQNNNLNNKLECDHNFLSFHGNENKRHEELTKHDLELGEMAKKKRRVGSASKEDEMRESELGLSLGLHTKNSNDDLEQEDNDRELLIEEERREIKNKENSIIMSNFNSIQNKPQRPELQAMAPPQNRKARVSVRARCESATMNDGCQWRKYGQKIAKGNPCPRAYYRCTVAPGCPVRKQVQRCLEDMSILITTYEGTHNHPLPVGATAMASTASAASASFMLLDSSNTNNTNLSNSLHLNPNILNSSSPSFLQTQNPTNHLFTPLFPTSSTSH…
>CsWRKY24	MENFGEWDQNKLKNELLKGMELAKQLQIQLNVRPTPSSSMAAAAASSSSSSSSSSSDGCELLVQKIICSYEKALSLLNSYGVQIMYESPSSFNGGSPRSEDSDREFKDPFDLTNANSFRKRNILPTWTQKFQVSPGMAIEGSLDDGFAWRKYGQKGILGAKHPRGYYRCTHRNLQGCLATKQVQRSDDDPTIFEITYRGKHSCSQVSNLSTPCTTTPEFQQQNQGVVVELTDQKKAHNQQTAPDALLDSWSSLRVITQNLDTTPLSYDRVEFASASTVDVNFAEFSSFLSPTTSGSGLSYFSASSSGLSEGFVGNQNLNNLQPNNCEIFSSPTSALNTQTTTALDFSFGELQMEPTFSFDNTDFFS
>CsWRKY25	MEDYNNNNDDDQQQIIKIEDTSTITDGGGGGDGGGRGGGDGGVFSFSDNIIPNGLFDFCDGDKCSVGFMELLGLNYNSEFTEAFNNPPATPNCSSSVSSASSDALNDDEPPPPPPQQQQQQHSPTKQLKGIKKRKEKEKEKKARFAFMTKSEVDHLEDGYRWRKYGQKAVKNSPFPRSYYRCTSAACNVKKRVERSFADPTVVVTTYEGQHTHPSPILSRSALAVAIPPPSFIPGAGGECVGGVVAMPWLKPSNNDAHDGNTVPAMSHQYFQNSTYITAQNVAANYNRNNHIGAANAAGILQEKRFCNPNSSFLVDHGLLQDVVPPHMLKQE
>CsWRKY26	MENYQMFFPCSDGGGGLSAYHHADMSSGGASDMFGNFQGGDMEAVSGFLGMKREVDGGAVEAEGGGKKKGEKKVRKPRYAFQTRSQVDILDDGYRWRKYGQKAVKNNKFPRSYYRCTHQGCNVKKQVQRLTRDEGVVVTTYEGMHTHSIDKPTDNFEQILSRMQIYSTPF
>CsWRKY27	MKTRYSYNNYNINTIGWPSLPQPHKKRAREVSYPKSKRKKEHRQRDIDIMDCSWPDTTPFDRRKAADELLRGRELAQQLRAYLQISSTPASQDLLTRILSSFSKTLSILNHRCDSDDINGSIVDSPEDHGSRKSEESGDSCKSSTPNNDRRGCYKRRKSCQSWARESCDLVDDGHAWRKYGQKTILNAKYPRNYYRCTHKYDQTCQATKQVQRLQDNPPKFRTTYYGNHTCSNFLKASDIVLGSSNFDDSCSGVLLSFDTTAAPNFFLPHDPTLVKKEEVVTPDAGSGRDDEAVCSPSDYMSTADDHLSEVFMGSVVDFEDDDLPPFHF
>CsWRKY28	MSNINQTINTLAGGSSDNRTNNFAMEVPKFKSFQPPPFPMSPSSYLSSFSSGLSPTEILNSPLLFSFGVFPSPTTGALNLRNDYEEVDQQEMKGDVKNYSVSAYNPQTGSSVSSYFQSSSSNLTLLNPSGLSCDESGAKSEFVNTEMAAAESKQNSQLAIYNREQQKSENDGYNWRKYGQKQVKGSENPRSYYKCTFPSCPTKKKVERSLDGQITEIVYKGTHNHAKPQPTRRSSNSGVYDPSAAETGVLQEDCSVSVGEEEFEPNSPFSNSIEDNENEPEAKRWKGENENEGYCGGGSRTVKEPRIVVQTTSEIDILPDGYRWRKYGQKVVKGNPNPRSYYKCTSLGCPVRKHIERAANDMRAVITTYEGKHNHEVPAARGSGGGGYNTINRPIPTNI…
>CsWRKY29	MDNKATERVVIARPVASRPTCSSFKSFSDILTCAFDTSPPNMSSETRVAAIRPKTVRFKGKISETIPGTNSHSSSDTLAVSEIKTTVLFKPLAKHVSKRTVSQLSLMGNTNLQNCLPPPPVEVCIQCPNQDDGNFQSALTSNLCIQCPNQDNDNFQSAPTSDLPQNITSTVENSQSIGSSRVTLSYSKKDPTLLRPQISGAQPSYDGYNWRKYGQKQVKGSEYPRSYYKCTHPSCPVKKKVERSLDGKVAEIVYKGEHNHPKPQPLKQNSSGTQREGSISNGTTQDTNPELWFNYLNGRIEGCESRIENHIEKTCQDRVTIPFDPFSNQEVNARCGISDNNSCGLSVECEEGSKGLQSMDDKLRSKRRGGKNPTNEGETLIEGVNEHHAMAQDSTGIEI…
>CsWRKY3	MDAAAAFGRPRPVVKTEKPPLRDLSDNDRSSPSKQQQQLLLVKRGNNHAKQEHDTTEDKTSCSSDQKDLSCIKLQEDQLESARAEMGEVREENQRLKQSLTQIMKDYEALKMQFLGIVGRDCKKVQDEDNDVNKEQQQQQHDDDQIELVSLSLGRFPVSEKKKIVDEKSCMNIIGGDHNEEAACKEALSLGLNCKFEREESMMAVAKEVDSPNSFDHESTKEEAGETNWPSKGGKTMRSVEDDVTPQNPPKRARVCVRARCETATMNDGCQWRKYGQKIAKGNPCPRAYYRCTGSPTCPVRKQVQRCADDMSILITTYEGNHNHPLPASANAMASTTSAAASMLLSGSTTSATAASSSSTASNSLHGLNFYPNNSKPNFYLPNSNSSIISSTSPTHPTI…
>CsWRKY30	MAVDLMSFPKMDDQIAIQEAASQGLKSMEHLIRLLSHKQSSNHVDCSDLTDATVSKFKKVISLLNRTGHARFRRGPVSSTSSSSSGSSAHLSQNQAMTLTPTPFTSPPNVPALPFTAPATVAQPQTKVVATAANFLSQPQSMTLDFTRPNILNSNPKGADLEFSKETFSVSSSSSFMSSAITGDGSVSNGKLGTSIFLAPAPTASGGKPPLSAAPYKKRCHEHDHSEDLSGKFSGSTSISGKCHCSKRRKNRMKKTIRVPAISSKIADIPPDEYSWRKYGQKPIKGSPYPRGYYKCSTMRGCPARKHVERDPNDPAMLIVTYEGEHRHTQSSLPENMAAAGGVALVFESS
>CsWRKY31	MEVSSHHSFKPNPNHEHHLLSTQPTPEEEQPLSKKRKVVQKTVVTVKIGSKKAAIGIGKMKNEGPPPDFWSWRKYGQKPIKGSPYPRGYYRCSTTKGCSAKKQVERCKTDGSMFIITYTSSHNHPGPNISTLNLDQNYQQEIDPPQPLDRDDDEDHHDLVPNQAQDHDNNSNNDDKNSIIISQSTEEEEVEEVEEEEEDELLLVEDEEKKGIEKIKDECLDQEPIIISSSSNSSSCCDELMIIKTKKSEIENHDHFFDELEELPIPPPFSSTLMRSSYSFDEIRISAAPS
>CsWRKY32	MMENFPSFLSTSSSSSALSLQQILFSRASNHGGDHFRQPPFVSDGFPILFRDVSTDDMSFDATSSVKDDDRNNVAVSVSTERFRVDGSSGRSGVVEYGLKKEEGEGRGRGEDCDKKKKMRNRRFAFQTRSQVDILDDGYRWRKYGQKAVKNNKFPRSYYRCTHQGCKVKKQVQRLTRDEGVVVTTYEGIHSHPIEKSTDNFEHILSQMQIYTTSY
>CsWRKY33	MEDWGLQAIVKGCNGIPIGSSTTAATTRLMEDSNWYSFLRSDQEEDEFFSSCVYNSSYNNPQISSSSIFHDEFEGLFGRNSSNNSAAASISHLLRDFKEPADQKLHHKNQIIQPTKQKQSKKSRQNRVVKEVKADKVCSDSWGWRKYGQKPIKGSPYPRSYYRCSSSKGCSARKQVERSLSDPEVFIVTYTAEHNHAEPTRRNALAGTTRKKFPALENPNLDMILSPNNSTSVASIEEDQHPMEGVTDGEVLIDMPFEFFTGLEDLLFG
>CsWRKY34	MGDDNINQMGSTSSSSMMNNCEIIDWDGLFSSSCLSNNLEMVEKGICGSDQDDNNYYPMGDNNNNVVIGGVKEGDIIIGGGHNNNNNNNNCKYKGKMVMGKRSTIASPRIAFQTKSVEDVLDDGYRWRKYGQKAVKHSNHPRSYYRCTHHTCNVKKQIQRHSKDPTIVVTTYEGIHNHPSEKLMETLTPLLKQLQFLSGI
>CsWRKY35	MESGWSWDQKSLIGELIQGMELTKQLRAELGSASGEESKGSLVQGILSSYEKALLILKWNGPMNQLQMVEATPGLPSSPISVNGSPSSDDSGRVLKDPQDSRKESKKRKTQPRWTEQVKVNSETGFEGPHEDGYSWRKYGQKDILGATYPRSYYRCTFRNTQNCWAVKQVQRSDEDPSVFEITYRGKHTCSQGNYLAQTCHSPDKQEQKETDGDHHELQPLQENLFGNQTIQNIEKLENKASTFCFGSSSTSVGCKDIVNAGFSSLAIDTHSALGTFPQSFTSPTSPDKNYFTPSPCQRSNVGGTHSVQNLDPDVHEIFSANTSATNSPILDWDFPFDSDHINPNFPFNSQGFFY
>CsWRKY36	MDSLAAIPWSDTHTTVSDDHLFTLTNLLHDDENHASSPLFLLPQDADDNNRAIRVPVPGGATYFGPTIEDIENALSIGTPRSKDLQSHTQISHTGFSIVERANLNKVEHKYSLRIKSCGGNMVADDGYKWRKYGQKSIKNSPNPRSYYRCSNPRCSAKKQVERSIEDPDIFIITYEGLHLHFAYPFFLMGQSPQAQSPTKKPKTIDPEQPEAHEKPSFLDPIESSGSQGLLEDMVPWLIRNPSTHHNALSNSSSCLSHRSPPPTPPSPSTSPTFITSCF
>CsWRKY37	MLLLNNNMAVELLVGFGDATPSNHFTPNMEENAAVSAVQEAASAGIQSVQNFLRLMSHTTNHQHSQHDSSTSSTPNNGYQAVADSVVNKFKKVISLLDRNRTGHARFRRAPVLTTTTTTTTPPPPPPPKVKPQHQDPSSSSPISVPPVQVKKQESVSAFKVYCPTPSSVVRLPPLPHNNPHQPSHPSNTFQAQQNTSSVVLKNGSVDRKDATTTINFAASPPISAANSYISSLTGDTESLQPSLSSGFQFTHMSQVSSAGKPPLSSSSLKRKCNSMEDSAMKCGSSSGRCHCSKKSRKNRIKRVIRVPAVSSKLADIPPDDYSWRKYGQKPIKGSPHPRGYYKCSSLRGCPARKHVERALDDPTMLIVTYENDHNHAHSTETPAPLVLESS
>CsWRKY38	MMDIFLDLNVDPNSSYANSTMDEVAHHSSQKRDQFDGEIYGDKEKLALSLSNKGSESSPTLEQELDRKIQENGKLSQMLRIMYEKYINLQKQVMYLLSNQKQSTEMEGVCSRKRKAEGEQEDYENLEGICSTRDEDFNRWLKRPRLNGNSKVSKVFVQKDASDPSLVVKDGYQWRKYGQKVTRDNPSPRAYFKCSSAPNCPVKKKVQRSLEDPTILVATYEGEHSHASHFQTELSLRSINGGKGSAVPVLATIKPSCATVTLDLIHEDGLFKSPKDYASSESAEAAVWQEFLVQQMASSLKKDPEFAGIVAGAISGKVLGNQTNRE
>CsWRKY39	MAAGNDDWDLSAVVRSCNSAGSATDPTSAAAEESALSCLASLTFDDDPNDVAFSFSDIFQPKQPNGFHELHQAFISFLPNPSTTATTVTTVPAAEPEIPYLTTPPTNRHFRQVMKPIRPNPHPHPVALHHHHRQPPFSPDLPNSPMTHSLIPKSRKRKNQQKRRVCHVTADNLSTDMWAWRKYGQKPIKGSPYPRNYYRCSSSKGCGARKQVERSNDDPETFTITYTGDHSHPRPTHRNSLAGSSRNRSSSSSSSSRHPTMGDSDPPMMTASVLLPSSSSPAASPITPLNDYDSTIGEKDGEMFEDMPIDSDDEDDDDDILIPNLTVRDEIYVGFDGVGRGRSS
>CsWRKY4	MAEPESFGTHQLGSSNAATEGQEDDEEEMDDSDDESEVDLGGEGGGTGSEFKPTELTTGSSLNEALVTGSLSETLTVASSAENGPSDGLQPDEGAELKQAPSSHSEPLAVEATQTDKVQEQNRLQLTIFKGPDSDQSPTSVTQSISSYASSNLSEHKLSPKRVQKICKPEPSQKNFFNHKTPSSVPNARTPASDGYNWRKYGQKQVKSPKGSRSYYKCTYSECFAKKIECCDDSGQTTEIVYKSQHSHDPPRKISTPKESKLVPYVEPVVKKIIAEHSRRVINDSDSPTPSKEPLREAAIVVFERKRQHSNDSNGNDEYKIKDENDDEPGTKQIVKKSSAGNSGTPLKPGKKPKFVVHAAGDVGISGDGYRWRKYGQKMVKGNPHPRNYYRCTSAGCPV…
>CsWRKY40	MEEAIISLILRGCSLARQLEFNVLNLGSNNINISDQSHFMARSCDEILGVFSAAKDRLGSHEPPPLTGVQGEVGLEEWLKSTCSQAMELSQMQMISPSPPSAIVSVPAAVKDSGKLMAMGLSSSSSSSSTKARRRKDDTEKRTVRVGAPRIGNTELPPDDGFTWRKYGQKEILGSRFPRFVFRFFYFPLFSFHTFHFLFVLAFEKCLHFGFG
>CsWRKY41	MDAPEFSHGRISPAELRRKITAKLLPGQDSAAHLRILLQSATATEQDKRALATKILTSITEAISILESAGEELSCPDHSLCSDLDSGESRRSRAVKDNPSRANKRRRSMNSRSVRTSRTTEDNYGWRKYGQKAIHNTTYPRSYYRCTHKFDQGCQATKQVQRMEGDDSEIMYNITYISDHTCRRPASPIDASAITTLSDSSNLISFSSIDCNGPFTEGTGYSLISWRPSDDDVVKIGETATTSGSTDDHEIDLWSDLKDFLELPNNGYDNDNEESILFLNRR
>CsWRKY42	MGEDDEQPPPPPLPSKSKSFPLRPTINLPPRTSMESLFSSGPGLGFGFSPGPMTLVSSFFSDSDDCKSFSQLLAGAMASPVTAVPSSSSEFKASPGLLDSPGLQGPFGMTHQQALAQVTMHAVEAYSLNQMQASSFSSSVAPSASSLQLLTSLPGEKTNDQLMQLPFQNSTVASKEISENSQSEQRLQLSSCNVDRPADDGYNWRKYGQKQVKGSEFPRSYYKCTHPNCPVKKKVERSLEGQVTEIIYKGEHNHKRPQPNKRAKDVGNSNGYSIIHGNLELSSQVQSGYLNKLDEETSISSIRKKDQELSRVTNDQFLGNSDGEGGSETETGVNRKDEDEPAAKRRQQVKLIYWTMVTGGVSTGRKLLRETLTQGAIINAQLQDAMFVNM
>CsWRKY43	MAKKDDSATRPPLQRPTITLPPRPSMEAFFTGGPTGVSPGPMTLLSSYFADGAVDSPSFSQLLAGAMASPMAMGFFGTGSTPNYYAKDGPASELEFGMKQSKPVNLVVARSPLFSVPPGLSPSGLLNSPGFYPPQSPFGMSHQQALAQVTAQAALANSHMHMQQAEYQHSSVPAPTEPLVRDPSFSLDDASQLAIIPSTSDTKSLIAESTEVSHSDRKYQPPPPPHGSDKPADDGYNWRKYGQKLVKGSEFPRSYYKCTHLNCPVKKKIERSPDGQITEIIYKGQHNHEPPPANKRARDNIEPAGCTNSLIKPECGLQNQAGILNKSSENVQLGSSDSEGRADTEITDDRDEDEPNPKRQNIDAGTSGVALSHKTLTEPKIIVQTRSEVDLLDDGYRWR…
>CsWRKY44	MSNEGHDHEKEEDHPYYPQFDPFTHNFHHQKPFEVPPPLTNPYYEAFDIAPSSVGFYSDFSHASSQYDYHNIFSTPIEMSCSSSEVISSVDDALKKSSSLGRDLSSVVTGEHPSTPNCSSTTCSSDEVVAGGGDSSKSGEVKGFDDKKGENSKKVDEGKKKEKREKGPRFAFLTKTEIDNLEDGYRWRKYGQKAVKNSPFPRSYYKCTSQNCSVKKRVERSSEDPSFVITTYEGKHNHYCPITLRGHNPTGVLPPSVTPPLFPPSPNFFSAESFCENLHQQYQYGGLFQDFINNPSFNNSNQHPSN
>CsWRKY45	MEFFFSATLDDRSGNGRRTQPDLAVVAMGNPPLSPPLFSPSSFFTIPPGISPTQLLDSPLLLNSSRILLSPSTGDLRKSASNCSGHHQQNVKQEHNNITKFSFPPNHTTKSSSSSSIFQSSSTSEVQTQAWGLEWENDDRGDGWGMRNRSGSEDGFNWRKYGQKVVKGSENPRSYYKCTFPNCPVRKQVERSLNNNGQITEIVYKSKHNHPKPDFTRRSSSSFSSSSSSSSFEPAQLKSIPSHSVTTPENSSITIGDDHSDQAHPRRWKSESSEKEEMIRGGGGVKTMREERIVVQTISNVDKLDDGYWWRKYGQKVVKGNPNPRSYYKCTYPGCGVRKHIERASHDFRAVVTTYEGKHNHDIPTARAGKPILSNQQGRNNEVVSSSIGGDPRSSSKIC…
>CsWRKY46	MEEEKIKEEVLRNNRDQNSMGNPGLLFSDAIIPNNHTTNLFDFPLIDTIDSSFKPSTFLDLLKAKKKNQKKGREPRFAFMTKSEVDHLDDGYRWRKYGQKAVKNSPYPRSYYRCTTAGCGVKKRVERSSDDPSIVVTTYEGQHTHQSPIMPRGALSSTAFTPSPQQQPPLVFSQPQQLYRNQFTYAPAPPADVVTCGGGFGHSGGPFWKVEFGRGDSISASKSAAQNNIPGPNSTVATLVTKFQNLGLSLRDMVALSGGHTLGKARCTSFSSRLQTNGGSPNEGANQEFIESLKQLCSAPGSSSTLAQLDIVTPATFDNQYYINLLSGEGLLQSDHVLVTGDYQTREIVETYAVDPVAFFEDFKQSMVKMGSLKPPAGTQTVIRTNCRTTNSLEALLIL…
>CsWRKY47	MFDGWLNENSSSLTDSVMYPVYQEGEVDEFVGNTIQQGEPSSRDYGREREIRERFAFKTKSEVEILDDGFKWRKYGKKMVKNSPNPRNYYKCSVEGCPVKKRVERDREDPKYVITTSNG
>CsWRKY48	MADSPPPPPPPHPLFSTADSSSTSPSDALFFFPPDSDSTILTEFGWNFHSLQPQPSRFPHSHRIHSDFPPTSTTTTTTTTTTTTPLIEDSAGLSDAPLPLPSNPSLSSSSSGEPLDKPPEIITPRKVKKKGQKRIRQPRFAFMTKSEVDHLEDGYRWRKYGQKAVKNSPFPRSYYRCTNSKCTVKKRVERSCEDSSVVITTYEGQHCHHTVGFPRGGLTIAHETSFGSQFSPQIPHFFYPDPPPPPTTTNNHNPPTPPIDQPLHHFPSTPSSTEQQEPPNSNLQQLPSNEGLLGAIVPHAMMRRTT
>CsWRKY49	MGSSASEEEMMVRLLKGGDQVAAAVNAAAITTNLICLPENNNKNNIISVVQQSLKPLFFTTTHHHHQQQEQQSLFPFCFPSTTTTSHLLPSSPSSLWDERGVSFMRGRNAIGNYGGEDDHNNENDGKPRLRVSTMKMKRIKGRKKVREPRFSFKTMTDVDVLDDGYKWRKYGQKVVKNTLHPRSYYRCTEENCKVKKRVERLADDPRMVITTYEGRHAHSPSDHNLEDSFMGHLPSSHLTNFFC
>CsWRKY5	MAVDLAAFPAFFDDQTAIEEAATAGLQSMNHLIHLLSKQHHHHHHHHSESPNNIDLNSSLLTDFTVSKFKRLISLLNRTGHARFRRGPSDSPNPVLNSLDPPQKTHFSKLNFSPVSKVPESRDSTTTSSFVSTVTGDGSVSNGKLDLSVYATPPANAGKPPLAMKSKCHDVSGFGCKVPNSKLCHCAKRRKSGMKKTVKVPAISSKIADIPSDEYSWRKYGQKPIKGSPYPRGYYRCSSVKGCPARKKVERARDDPAMLLVTYEGDHRHPHPTVTDGVSQKS
>CsWRKY50	MNSLQNPNFFFDHHQQFDQDHSSSSIMDFLNFSGYPLPDFGLEAETTTFSLSEAETGDGSGSMKATSIDNNTIDDGWFEGKGVKRKKPRENGRTNRVAFITKSELEILDDGFKWRKYGKKSVKNSPHPRNYYKCSSGECGVKKRVERDRDDSSYVITTYEGVHNHESPFLMYCNGSKLFHPHPICPNSSSPPYSSTTTL
>CsWRKY51	MAVDLISHLSPLPTMEPNAVQEATSGLESVHKLIRLLSIPNPHSLPSSTQSPIDFPTDCRAAADAAVSKFKKVISLLGRSRLGHARFRRAPLPQQPHYVTPIQQIPPHPHLNNNNNINDESLNFSAHNSFISSLTGDADTKHPSSSSSPFLISNLSQVSSAGKPPLSSSSLKRKCSSENLRSGKCAAASSSSRCHCSKKRKLRVKRVVRVPAISLKMADIPPDDYSWRKYGQKPIKGSPHPRGYYKCSSVRGCPARKHVERAVDDPAMLVVTYEGEHNHTLSLPETSTLILESS
>CsWRKY52	MDKGWGLTLRDSEHQSIGFFSNKPPPPPPPPTLNSFQRMFQGLEFSGKLGHTDSTPDDNNRLAVEVDFFSAKKRVVDDLEADQDSKPTSTTSIIKDDKALTPPPPPTTSFNLVNTGLHLLTANTGSDQSTVDDGISSDGEDKRAKNELAQLQVELQRMNAENHKLRDMLSHVSNNYSSLHMHLLSLMQQKQQQQNHPSEPAHQREIGGEKKSTEIKHEVGKVMVPRQFMDLGPSGNSNIGESEELLCNSSSDERTRSGSPLNINNNNNNTETASKKRDHAEIMPPNSDHENSKRSIPREDSPESESQGWGPNHKTPRFNNSSNSKPLDQSTEATMRKARVSVRARSEAPMISDGCQWRKYGQKMAKGNPCPRAYYRCTMAVGCPVRKQVQRCAEDRTIL…
>CsWRKY53	MSDEMFKDLFYSGMDEYESIVRAFGITSDYSNINNEISGTTAMNSSCSLSSSDAGGGEEDDSVKEKEKQISKDVVEDNGGESSKAAGSGKSKKKGEKKEREARVAFMTKSEVDHLEDGYRWRKYGQKAVKNSAYPRSYYRCTTQKCGVKKRVERSYEDPSIVITTYEGQHNHLIPATLRGNLSAASGTFSPSMLTPMPVVGGVGFLPAELLSNAGNNQAVGGGATVYSHNNFDYTYNGRQPEYGLLQDIFPAPSSFFNRQP
>CsWRKY54	MLLLFEMENYEEVGDLTDIVRGRSSTTTTRSSTTTTTTTTSSSSNCKTEILADHHLQDSTSFYYSSSSQLLQLQDHQHHQYNFGDPFCSVVAPSVLDHHLHQHHHQLPVDNSTNINAFFNGISASSTTTTAAAAHQDHEDHHEVMKSSPCNSNLFSRMLQISPSPNKFQTISSLTNNSPPPSNFLISNHSPTTTTTPLHPDHHLHHFLHHHDHNNNNNNNTSSALHISSPRNPPGIKRRKSQARKVVCVPAPVAASSRPNGEVIPSDLWAWRKYGQKPIKGSPYPRGYYRCSSSKGCSARKQVERSRTDPNMLVITYTSEHNHPWPTQRNALAGSSRSSQQSSKNNTSTITTTSTTTQPNSSKLVHHKNKQEVQEEEEEQDHENNNDGTTMTLLSSTAA…
>CsWRKY55	MVSTGDGDQLENEVDSDQLDHENSSDSQPQASQDDPGGTNASKSDHKCTGASSNTLEEAVKQPEVTIALVDRGEISSIVTEKVTHKPITAEQNPLSVLKVCITSSIREKVSEDGFNWRKYGQKLVKGNVFVRSYYRCTHPTCMVKKQLERTHDGKITDTVYFGQHDHPKPQPHIPVPVGVVTMVEEKLGEHASGNSQDKTSIALSQTPQQTELADMRQPPSVIASDNVKDEVSKRSRTNDEVDSDDTPDLKREKKRCNIDVTTVADKSTVESRVVVQTPSEVDIVNDGYRWRKYGQKFVKGNPNPRSYYRCSSPGCPVKKHVERASHDPKIVLTTYEGQHDHVVPPIRTVTLNSVGSTTAQSDETKPKPVSTVVHASKDPRSDSSSEGKLIEENGKLNA…
>CsWRKY56	MDSPSPPPLQFPVNLNSTLPHPRNSPPPPPPPPPPPPPPPPPPPAAHRPFFDEMNFFPSDDKSRVLSASHSNLTPTKLPFNVNTGLNLLTTNSCSDQSMVDDGVSPNPEEKRVKNERAVLQAELERINSENLRLKDMLNQVTSNYQTLQMQFNTLIQTQKTEDVGDPIEENPDGSGGGGNNNNNNNTNISNKLVPRQFMDLGLATNTENDEASMSSSEGRSGERSRSPGNTGEVASSKRQSPDQSSNWGSNNNNNNNKVPKFSSSSGKEVDQTEATMRKARVSVRARSEAPMITDGCQWRKYGQKMAKGNPCPRAYYRCTMALGCPVRKQVQRCAEDKTILITTYEGNHNHPLPPAAMAMASTTSSAARMLLSGSMSSADGLMNSNFLARTLLPCSSSM…
>CsWRKY57	MDRRVRTNPFLSEQEDPEATSDDGLPESPSDCNDSKPTAAPPPKKSRRGVQKRVVSVPITDVEGSKSKGEAYPPSDSWAWRKYGQKPIKGSPYPRGYYRCSSSKGCPARKQVERSRVDPTKLVITYAFDHNHQLPVTKSHHHHHHNSSPSSAVIAAVSAATDFPSPGSTTTSSSTSSGDNTNAAPSSPAAKFEEAAAVFASQPELELGGDSLMIKPCIGDFGWLGEVAYDRILEGPICGGGDIFDDADVMVLSTRGDDEEESLFADLGELPEGSVVFGRRRTVQPNGPNRTCGTVLNC
>CsWRKY58	MSNDEGKNVYQQYDPFQYNQLDMNRSIFHQQAAAALDPGLMSFTNFFDTSSLEYNSLSKAFDVSCCSSQVISAVDDVSKKKASTTTPNSSVSSSSNEAAVEEDSVKSNKLEDIKGRCENKDEEKSKKQNSNLSKKKEKRPREPRFAFLTKSEIDHLEDGYRWRKYGQKAVKNSPYPRSYYRCTSQKCVVKKRVERSYQDPSVVITTYEGQHNHHCPATLRGHSAGIMSSPFYASASASVTAASSGPTLPQELFSHLLPTNNCQTDPAASMMYQNLSLQQHLQLPDHYGLLQDLFTQK
>CsWRKY59	MEFLSLIQELNQGKQLANQLRTHLHPSSSSHGILLIDKILRSYENALLALSGGAAASVNSAIAPVNAAVQDGDVSKKRKVMAKWSEQVKVSSASAVEGPGCDGFSWRKYGQKDILGSKFPRSYFRCSHRFTQGCLATKQVQKSDNDPTIYEVTYKGRHTCNKALHSTNTPQEHQNTFLQHPIPPKQEDKPLQQLHDPLCFMFSSDPIRVKSEDLEYANGGLFQPLRTPSPMFGSEVQDDLSPFRESECSPTFESNDMFGLWCDFETEFVSIPSSMTNISIGDLEECFSFDNLEMFC
>CsWRKY6	MDDVSFNHNNHHQFYSSDPFEDSDELKPTPDSPPPTSTIAAAATTKKGRRGMKKKIVSVKINGDSPRNSSGSATPPSDSWAWRKYGQKPIKGSPYPRAYYRCSSSKGCPARKQVERNRLDPTTLVITYSCEHNHSGPVSRNNNNNNNQNNQIVVMKPGSPETVAVHQEPEVEEKFVEIGGGEESLITADEFSWFGEMETTSSTVLESSIFSGRASTGLVDHSISSDVAMLFPMGDDDVDESLFADLGELPECSLVFRRGGGRGLPVDEQPAAAQRRITPWCGTTT
>CsWRKY60	MQGSGKRRRMDHLQGRNLQMGPLCLGNPSLELNTNAKTCSIQQIQSQSAALYHHHHHHLLQNRVVLNNNPNPPQPEVVYLRSSNGVNLNFDSSSCTQHTMSSTRSFISSLSIDGSVANLDGSAFHLIGAPRSSDQNSYHKRKCNGRGEDGSVKCGSNGRCHCSKKRKHRVKRSIKVPAISNKLADIPPDDYSWRKYGQKPIKGSPHPRGYYKCSSMRGCPARKHVERCLEEPSMLIVTYEGEHNHPRIPSQPANT
>CsWRKY61	MEEVVAADSLRYPFLDASDSKSCLGTFMELLEVDQHFSSQFDVFETSSPSLSSSLISNPENLEIWNQWPTTPNYSSSISSTSSEIVNGELTTEPNLEGGEQKQDQQPTVKADKQLKTKKRSPKKKGAEPRFAFMTKSEVDHLEDGYRWRKYGQKAVKNSPHPRSYYRCTSVACNVKKRVERCLQDPSIVVTTYEGQHTHPSPIMARSTFFPPPISATLYNDYSIQNSHNSNVMSHSIAWCHH
>CsWRKY7	MFCSLFEMDNNNYQQAGDLTDVIRLSSAPVAGHFSSEFSLDPFSGDRQLWSHLPADNSSMNFGDPLSFPTRDPFLLPHFSPFNFASDGGGEGLAADDQPSNLLSHMLQISPSSGDGVISTPPCESLATAVGNSPRSTSVRGGGGLVLPTGGSNSLCLMENSGIQISSPRNSANKRRKSQVKKVVCIPAPAPANSRSSSGEVVPSDLWAWRKYGQKPIKGSPYPRGYYRCSSSKGCSARKQVERSRTNPNMLVITYTSEHNHPWPTQRNALAGSTRSHPSRTTTATTANKTSPKHERINDILPTTTIKEEEMDEDQMTDKATTTNDNQEEGDHQDFPYDLIFTEFADQMNDLEHDNNHDHNHHLSADPLNNNMLMFSNHGFSAGNGEGSKDPFLELYDWA…
>CsWRKY8	MDSDYELEEPNRQIQIRKPTDFFNKLVFLQADLIYNAMEFVIAPAYTLLSLFAESFQRAEETKHTVESAVRKSPSVVAQRVKVAARRMSYGAVAAGMMCMVMVLLLVVAMGVSGLGIRYWIEEPVDVKEKLKFDYTEARPRALFGTGNGNTMKMKKKNLGIPVGHTFYLSAELISTNGNVITSSSQPCMLRFRSAPVRLARTIITSFPVLVGISSEAQRLSFPILEHKEEKQERSAAIQVTISPRIGTSALPELYEADILINSKPPKMKELLRRWQWTCFVWTSMYLYLMFVVMFMFFWKPVMFRAMTLRPHQLIRDLDQDPRRREVEGDESSLDEMAEITVELLRKWQEMRRKRKAAMFGYGSGEEDVGSTSASSISCSRDYTAAVFEEDVGDSESFM…
>CsWRKY9	MEEVEEANKSAIESCHGVLNLLLQPPPSPHHHQHHFKNLMLETKEAVFKFKKVISLLNSDFSHPRFRNFNKIPLPLPQNSLLDSPNYTLHPPNKNLFNSPPGFNSKVSILLGNPDLELSQNDKNSLHIPKQSPSLSFSFPHHHHPQQQQQQQQQQQSLLAHQKQMKHQAEMMFLRNNNGMNLNFDTSNCTMTMSSARSFISSLSMDGSVIGDRSSFHLIGPSTTTTTTSGNSKRKFSARGEEGSLKCGSTSKCHCSKKRKHRVKRSIKVPAISNKLADIPSDDYSWRKYGQKPIKGSPHPRGYYKCSSIRGCPARKHVERCLEDPSMLIVTYEGEHNHPKMSTQSAHT
>TRINITY_DN72310_c1_g3	MCDSFLLQRMDNYQGDLTDIISGTIGSTTTSSSGDLQPTVENSWQFNDQSSDPMIYHSDDLFGHPFSSLRDPLLLEELDSSFFTSSNSVDQDSSGFCGGSSNIFVGDNNKNIEDQQEDQIKRAAACNNSNNHNIFSRILQISPNNNIKLPIPPCESPVPRVVLKPPPPPSNSTLICNDHHMIENTGLQISSPRNTGIKRRKSQAKKVVCIPAPAPANSRPTGEIVPSDLWAWRKYGQKPIKGSPYPRGYYRCSSSKGCSARKQVERSRTDPNMLVITYTSEHNHPWPTQRNALAGSTRTQPTKNINTKNSPGSQFQKAPLSSLKEEQKQKESTNDIINNVSPSVKKEEMDEEKEIEMHNGEQLGFPNHDQIYRPELPSSINHPDQDFFADLGEIEADPL…
>TRINITY_DN87933_c0_g1	MDEDDSLPPPPPFPENNINSINFPYLFTPSLPQYQQPLLQNSQFGLDNNNIDWVSLLSGTSSISGGNQIPPSASHVSLASRSNININGEGDENWWKNKRKAGRTKKSVPPRVAFHTRSSEDILDDGYKWRKYGQKAVKNSKHPRSYYRCTHHTCNVKKQIQRLSKDNGVVVTTYEGIHNHPCEKLMETLSPLLRQLQFLSRF*
>TRINITY_DN67799_c0_g1	MDGNGRKFDDWRVVSSPKGLVSEEFSMCEGPNCQKIVVKNEFKVEEEIGDFDENPSGLMSRGSIAERRAAKCGFNASRINVARFRSVTSPLSPPAMMSPYLTIPDGISPTALLDSPIMLPNCQAQQSPTTGTYPFPPLSHESLMLNSVTPAADVDRVSDVSSFSFKHDGGPVSLPCISDLTKKPPMDVEFPADYQKQTATNNCATDSSADEVKLSEVMILDANCNALKQSRHTITAGDQMSRFIEPTNGGDAVLARLLEGQQKEGYAPTGMLRSSEDGYNWRKYGQKQVKGSEYPRSYYKCTHPNCQVKKKVERSHDGQITEIIYKGAHNHPKPQPNRREILGSRFSFSEISGIESNGSGIKVEGGEIWRNIQLGCEDIKVGSDCRPDGLERTSSTSVL…
>TRINITY_DN70007_c0_g2	MDKYSPSPILNSAETQASKKRKMSQKTVLTVKIEENENGKQKSEGPPPSDCWSWRKYGQKPIKGSPYPRGYYKCSTSKGCSAKKQVERCRTDASLLIVTYTSTHNHPSPKEPKLEQPNIQITEEDNSLITPEEKDENDQQSLNGHEGEGASENITDFHYCQSPFNSSDHQDIVINIRQEEESTFTENLQTVLFDEKEKPLCYPHLMTFSTPKSEENDFYDELGELPPSTSYFTSFMRGNFFEDRILVHLS*
>TRINITY_DN74203_c2_g3	MDNSSWVDTSLDLNINPLRVKSDAPVDAESFGVPRKMKPTFMFQTKPSAKEETGAIEEELNRVSEENRKLTEMLTVMCENYNALRNQLMDCMCKNGEKELHGPSKKRKSASSNNNDNNIAMNGNSESSSTDEELSKKPREEVIKAKTSRAYVRTEAGDKSLIVKDGYQWRKYGQKVTRDNPSPRAYFKCSFAPSCPVKKKVQRSIDDQSVLVATYEGEHNHPHPSKVEANSSSNRCATLGSAPCSTSLGSSGPTVTLDLTKSKSNQDANKSFVRRIESPEFQQFLVDQMASSLTKDPSFKAALAAAISGKILQHNQTDG
>TRINITY_DN79512_c2_g3	MDSGIVDLSLSINLNVSPPPNIDDDHHHQTPNKSQGAFVDEKKPSLMKHENDPIVDELNRMNTENERLTKMLALVCENYNTLQSRFAELVQKDTSSTSPPTKRKSADQEHENYGNVYYCDLQGADSYKRLKEVKTNVSRVFVRIDPSDKTLVVKDGYHWRKYGQKVTRDNPSPRAYYKCSFAPNCPVKKKVQRSVEDCTMVVATYEGEHNHKNLSQAKEPMGFNQNVVPDSSPGSNSMPLGNSSDIELDLVQPAAGRLCSISTTNVVVPQAAKSPPHLVQQLLVEEMASSLTRNPCFTEALAAAISNKILEYDLEDGW*
>TRINITY_DN73261_c1_g2 (WRKY22)	MEDDWDLYAVVRGCSSSSSSSSANTNSAAATSSSSSSFTTGAATSSCSTDVFSLSGFQTEQENDQFLYFSDLQELPRSNNNIEELHDLFKPFCSPRIPPISSQITIPISPLSVLQDLSQQPIQQEKQKQKQILVGSRSTTFAAAAAGGTTRHNPQNPRSKRRKNQMKRVCQVPAEGLSSDMWSWRKYGQKPIKGSPYPRGYYRCSTSKGCLARKQVERNRSDPNMFIVTYTAEHNHPIPTHRNSLAGSTRQKPATSETVTDGDTSKPTCSTPISPAASLSPGTEKLDVEEEDDEFGGSDMALSDDFFMGLEEITSPIAGDGFSDHFPFPWSANNATTTAAGGV
>TRINITY_DN75981_c1_g1	MEGSSRLNSLSSSSRSAAKEEKSDESVGHKESCTRESSKEDELELAKAKMKEVREENARLKMMLEKIEKDYKSLQKRFLDSVNQEEAKNNSNNNAACSTIEDTELIVSLRLGTSPSTEPKKDDNNNIIISSFSKSAATEDHDEQLKCGLKLGLDYHLGGSKSGPTVEVSPENSLEERKNEDVSADETCPPSKASKTGRSEDDELSQQSNPKRARVSVRARCDTPTMNDGCQWRKYGQKIAKGNPCPRAYYRCTVAPACPVRKQVQRCAEDMSILITTYEGTHNHPLNVSATAMASTTSAAASMLLSGSSSSQPGLGLTPATTQPTNLHGLNVNLSRDISRTRPFYLPNTSSPTFPTITLDLTASTPSTPFNIFSSTFQSSPTPFPSKNLNFSSFESNNI…
>TRINITY_DN69869_c1_g1	MEIDLSLKLDSTDEEEAPKEDNNEQQVVVDDDNITKNMKTQEPEAPADEEILTSLHISKLQENFKPVELSVLQMEMSRMKEENMVLRKVVEQTMKDYYDLQMKFSVIPQNNHKKDPNFFLPLHGNDGTVDQSQETQTSPTILERNNHTPPRSSPSWQEKESELGLSLRIHESNTRSQQERGGEEDQEEDNNREDLMSNPNPRQNKLQRTDLGGITSHVASPPNRKARVSVRARCETATMNDGCQWRKYGQKIAKGNPCPRAYYRCTVAPGCPVRKQVQRCLEDMSILVTTYEGTHNHPLPVGATAMASTASAAAASFLLADSCNPLYNTAAIHSNFNQASNFPYQNIISPSPYNTISPPFIRSSSINPNDPCKGIVLDYTNNVCNINIPQQFLVANPSP…
>TRINITY_DN69622_c0_g1	MEYYNRFVHDQDDSPETATGSPLSGDDTIMADTPSPKKSRRIAGKRVVTVAIADGDVYPPADSWAWRKYGQKPIKGSPNPRGYYRCSSSKGCPARKQVERSRKDPTVVVITYACEHNHLIPSTTKHSQTTTTIPVKFPPEEVVVFANQTDLEPDNIDFAEFVTDFGYFTNITSVILESTVITSPRCMEPDTAVIFTRGDDEDSLFADLGELPGCSLIFQQ*
>TRINITY_DN76154_c3_g2	MKQQPEFHLFRSTPLSAYITTVMSNSSSLTMDHQVNPTPSSNCAGKAYNFNEIIDRPDFEKPCTNFNENIEVSDFEISDFLMFEQSSEGDFMSQSGVVSPEYLSGASPEFSSSSSRITNIKSENGVKKKVEVESRIAFITKSAVEIMDDGFKWRKYGKKMVKNSPNPRNYFKCSNGGCHVKKRVERDGQDNRNVITTYDGVHNHESPSVVYYNETPLMIPDGFTLQPSNSAAHSTSS*
>TRINITY_DN73545_c1_g2	MTDGWDLYAVVRSCTTTAATATPSVGDNHHMVMEDDEDPNPDFGSVLNTPLFSYPPDDQITIANHSRVQGLEEIYNQFSIGTQPQQIHQPQHQALLAPQAIITNSQTSTTTRSRRRKNQQMKMVHQMTQEELYGDSWAWRKYGQKPIKGSPYPRNYYRCSTSKGCAARRQVERSPIDGTILIVSYTGDHTHPRPTHRSSLAGSTRNKLSTVSKPASCSSSSAASASSFSPPLMEGESHEAQHDNNVKLVELEVDDDNADEEEPEEEEEEDILIPNSVRNEDVFKGFHELNGGTGFFD*
>TRINITY_DN75052_c1_g1	MVTSREGVSDEISSHKFQQRENFDTGLHDSVSNQKQSLLSVLPEKESGKLQQGQNPSTEPVALQISQESNTLPVIPEVVPNNLKPQSPDVVIDASQSTEEGSSMSVVRETEPDNLHQRQSLDSGNLTSESCQEGSSLSTIPERELDNLQQTQSPNTGTLSSETNQDGRTLPIMSEIVPEQRQDPDIELPASQCDQEKFTLSIKPEKILGKLPLRRNLDIGVPTLQSAQEGNTLGKIPEKPSQDGYNWRKYGQKLVRGNQFVRSYYKCTFPNCPAKKQVERSHEGNITNINYRGKHEHPKPQHGPLIVPIQARRPEKPNLNKTEEESSDVHSETPRHVAPVETPKLLIAEASADVMESAASQSTKTRDEVDHDGNPKSKRRKKDISSADNTLALANRTNG…
