# Supplementary material for: Genomic and Transcriptomic Analysis Provide Insights Into Root Rot Resistance in Panax notoginseng
Source: Front Plant Sci. 2021 Dec 15;12:775019. doi: 10.3389/fpls.2021.775019 (PMC8714957; doi:10.3389/fpls.2021.775019)
Supplement: Supplementary file 8 [file Table_8.XLSX]

## Sheet: Sheet 1
Supplementary Table 8. Pearson’s correlation between samples
	MK0h1	MK0h2	MK0h3	MK12h1	MK12h2	MK12h3	MK24h1	MK24h2	MK24h3	MK48h1	MK48h2	MK48h3	MK72h1	MK72h2	MK72h3	MK96h1	MK96h2	MK96h3	ZC0h1	ZC0h2	ZC0h3	ZC12h1	ZC12h2	ZC12h3	ZC24h1	ZC24h2	ZC24h3	ZC48h1	ZC48h2	ZC48h3	ZC72h1	ZC72h2	ZC72h3	ZC96h1	ZC96h2	ZC96h3
MK0h1	1	0.995067	0.963437	0.902184	0.986916	0.96983	0.905675	0.951173	0.978623	0.87208	0.93824	0.959691	0.94685	0.983719	0.883915	0.94767	0.873121	0.826277	0.890349	0.764028	0.936282	0.693705	0.68307	0.409879	0.547813	0.661479	0.790796	0.790307	0.671398	0.674467	0.730257	0.420348	0.359714	0.414887	0.504547	0.595807
MK0h2	0.995067	1	0.963401	0.905165	0.986796	0.96316	0.898107	0.957873	0.983214	0.872775	0.936519	0.958825	0.946186	0.980681	0.879241	0.943291	0.869605	0.801777	0.886281	0.756698	0.934929	0.683434	0.677501	0.386384	0.540837	0.658353	0.785697	0.78044	0.665812	0.666442	0.723512	0.410159	0.353031	0.410484	0.49674	0.59005
MK0h3	0.963437	0.963401	1	0.912386	0.967149	0.976047	0.962109	0.971594	0.947778	0.943602	0.976335	0.981282	0.976858	0.964739	0.947071	0.973336	0.944373	0.822438	0.94212	0.868266	0.958752	0.798423	0.802926	0.538367	0.708025	0.790089	0.883044	0.879974	0.79436	0.792668	0.830724	0.574259	0.516366	0.571989	0.655537	0.729202
MK12h1	0.902184	0.905165	0.912386	1	0.910531	0.901938	0.884314	0.954321	0.943186	0.905676	0.928101	0.932811	0.929983	0.923952	0.911166	0.938652	0.900286	0.765643	0.90185	0.782178	0.897459	0.74967	0.730234	0.493851	0.646782	0.72715	0.826309	0.817865	0.756122	0.743389	0.807869	0.529835	0.500496	0.56945	0.621834	0.708976
MK12h2	0.986916	0.986796	0.967149	0.910531	1	0.98766	0.928167	0.962424	0.975537	0.898793	0.954679	0.967227	0.96229	0.97741	0.907672	0.957147	0.893435	0.865233	0.911216	0.802472	0.950278	0.760964	0.735674	0.500943	0.604855	0.707873	0.827066	0.816562	0.708267	0.712416	0.764126	0.483648	0.421407	0.472602	0.564611	0.64908
MK12h3	0.96983	0.96316	0.976047	0.901938	0.98766	1	0.949698	0.954892	0.9475	0.918399	0.963205	0.968263	0.96662	0.962161	0.93047	0.965485	0.920851	0.895911	0.927527	0.846135	0.953851	0.814208	0.784464	0.5832	0.671157	0.756831	0.858654	0.855136	0.753635	0.75817	0.80203	0.555411	0.48144	0.529574	0.626568	0.698103
MK24h1	0.905675	0.898107	0.962109	0.884314	0.928167	0.949698	1	0.954035	0.905259	0.961436	0.963784	0.958527	0.969399	0.924284	0.965226	0.961606	0.960346	0.855147	0.936973	0.887266	0.927792	0.858107	0.861973	0.646372	0.792187	0.842343	0.923015	0.922837	0.860165	0.86116	0.88831	0.675781	0.631771	0.679156	0.749343	0.818524
MK24h2	0.951173	0.957873	0.971594	0.954321	0.962424	0.954892	0.954035	1	0.973179	0.953664	0.971389	0.979839	0.979824	0.968471	0.948495	0.973152	0.941279	0.813946	0.940197	0.83632	0.949327	0.782251	0.774259	0.510981	0.689456	0.77408	0.874147	0.870935	0.801205	0.793946	0.836435	0.560479	0.51907	0.581975	0.648262	0.739039
MK24h3	0.978623	0.983214	0.947778	0.943186	0.975537	0.9475	0.905259	0.973179	1	0.883872	0.940705	0.963482	0.951662	0.9846	0.893768	0.950795	0.878331	0.804141	0.9002	0.755306	0.934388	0.688822	0.676409	0.39239	0.554883	0.668311	0.795301	0.788506	0.692412	0.688348	0.745747	0.420403	0.381546	0.442044	0.517488	0.622302
MK48h1	0.87208	0.872775	0.943602	0.905676	0.898793	0.918399	0.961436	0.953664	0.883872	1	0.970753	0.961131	0.973165	0.906497	0.978979	0.96411	0.981172	0.796408	0.951084	0.917966	0.931246	0.883761	0.890021	0.664012	0.844745	0.874771	0.953271	0.954237	0.909023	0.908284	0.937287	0.741109	0.703496	0.753857	0.818805	0.87853
MK48h2	0.93824	0.936519	0.976335	0.928101	0.954679	0.963205	0.963784	0.971389	0.940705	0.970753	1	0.992193	0.993432	0.959842	0.980413	0.98695	0.97103	0.843174	0.974497	0.908851	0.970488	0.849561	0.842318	0.612655	0.775612	0.850706	0.926471	0.915988	0.84992	0.853368	0.883794	0.64759	0.597565	0.647765	0.729622	0.795396
MK48h3	0.959691	0.958825	0.981282	0.932811	0.967227	0.968263	0.958527	0.979839	0.963482	0.961131	0.992193	1	0.994423	0.982136	0.970386	0.991061	0.962659	0.831973	0.965355	0.880353	0.973785	0.813345	0.81063	0.546695	0.729382	0.804071	0.90643	0.900724	0.821975	0.824234	0.861707	0.599375	0.550774	0.60451	0.688291	0.763455
MK72h1	0.94685	0.946186	0.976858	0.929983	0.96229	0.96662	0.969399	0.979824	0.951662	0.973165	0.993432	0.994423	1	0.971737	0.982862	0.993425	0.974253	0.84241	0.966221	0.894864	0.969644	0.840428	0.838043	0.589559	0.758009	0.827442	0.921191	0.916613	0.842781	0.846332	0.881687	0.638282	0.59218	0.642445	0.722176	0.794142
MK72h2	0.983719	0.980681	0.964739	0.923952	0.97741	0.962161	0.924284	0.968471	0.9846	0.906497	0.959842	0.982136	0.971737	1	0.92499	0.971678	0.911159	0.821728	0.92876	0.811436	0.961816	0.732819	0.729239	0.440247	0.610616	0.70614	0.836056	0.835745	0.731314	0.736399	0.780169	0.480966	0.434241	0.488145	0.574916	0.666434
MK72h3	0.883915	0.879241	0.947071	0.911166	0.907672	0.93047	0.965226	0.948495	0.893768	0.978979	0.980413	0.970386	0.982862	0.92499	1	0.981251	0.992612	0.828232	0.966254	0.92988	0.942088	0.89274	0.888019	0.676661	0.846859	0.886362	0.956539	0.953119	0.902548	0.905846	0.932502	0.739722	0.69466	0.740736	0.813628	0.867851
MK96h1	0.94767	0.943291	0.973336	0.938652	0.957147	0.965485	0.961606	0.973152	0.950795	0.96411	0.98695	0.991061	0.993425	0.971678	0.981251	1	0.977497	0.846618	0.958724	0.889818	0.962665	0.833744	0.829196	0.579457	0.75002	0.814369	0.913039	0.913015	0.834551	0.836246	0.880216	0.628705	0.578283	0.630485	0.713852	0.786154
MK96h2	0.873121	0.869605	0.944373	0.900286	0.893435	0.920851	0.960346	0.941279	0.878331	0.981172	0.97103	0.962659	0.974253	0.911159	0.992612	0.977497	1	0.812086	0.956588	0.926751	0.931189	0.8785	0.88023	0.656756	0.852807	0.880274	0.951005	0.953525	0.903858	0.904115	0.9346	0.740468	0.690159	0.743115	0.814702	0.865666
MK96h3	0.826277	0.801777	0.822438	0.765643	0.865233	0.895911	0.855147	0.813946	0.804141	0.796408	0.843174	0.831973	0.84241	0.821728	0.828232	0.846618	0.812086	1	0.836594	0.768902	0.840887	0.802888	0.688862	0.705467	0.621742	0.690699	0.762133	0.76346	0.683465	0.691785	0.720887	0.556842	0.458448	0.495964	0.590648	0.644077
ZC0h1	0.890349	0.886281	0.94212	0.90185	0.911216	0.927527	0.936973	0.940197	0.9002	0.951084	0.974497	0.965355	0.966221	0.92876	0.966254	0.958724	0.956588	0.836594	1	0.942433	0.980405	0.851837	0.829969	0.630596	0.791142	0.839915	0.916667	0.912749	0.852106	0.86085	0.87629	0.669066	0.616115	0.666755	0.749989	0.80723
ZC0h2	0.764028	0.756698	0.868266	0.782178	0.802472	0.846135	0.887266	0.83632	0.755306	0.917966	0.908851	0.880353	0.894864	0.811436	0.92988	0.889818	0.926751	0.768902	0.942433	1	0.915934	0.909202	0.91369	0.738463	0.887728	0.885765	0.92854	0.923475	0.878151	0.899009	0.892744	0.781561	0.735582	0.749867	0.851593	0.870693
ZC0h3	0.936282	0.934929	0.958752	0.897459	0.950278	0.953851	0.927792	0.949327	0.934388	0.931246	0.970488	0.973785	0.969644	0.961816	0.942088	0.962665	0.931189	0.840887	0.980405	0.915934	1	0.811333	0.799358	0.554304	0.706853	0.775452	0.879309	0.877015	0.786104	0.800095	0.823718	0.581669	0.53008	0.571708	0.671964	0.740087
ZC12h1	0.693705	0.683434	0.798423	0.74967	0.760964	0.814208	0.858107	0.782251	0.688822	0.883761	0.849561	0.813345	0.840428	0.732819	0.89274	0.833744	0.8785	0.802888	0.851837	0.909202	0.811333	1	0.953269	0.898501	0.917844	0.904763	0.94178	0.925371	0.90027	0.917501	0.920092	0.894034	0.841406	0.841237	0.915832	0.922867
ZC12h2	0.68307	0.677501	0.802926	0.730234	0.735674	0.784464	0.861973	0.774259	0.676409	0.890021	0.842318	0.81063	0.838043	0.729239	0.888019	0.829196	0.88023	0.688862	0.829969	0.91369	0.799358	0.953269	1	0.807851	0.927151	0.905357	0.947971	0.932168	0.901536	0.921813	0.921734	0.87665	0.862129	0.848066	0.928689	0.936896
ZC12h3	0.409879	0.386384	0.538367	0.493851	0.500943	0.5832	0.646372	0.510981	0.39239	0.664012	0.612655	0.546695	0.589559	0.440247	0.676661	0.579457	0.656756	0.705467	0.630596	0.738463	0.554304	0.898501	0.807851	1	0.843245	0.817602	0.764456	0.747879	0.778759	0.791265	0.765802	0.883291	0.819178	0.804777	0.845038	0.813446
ZC24h1	0.547813	0.540837	0.708025	0.646782	0.604855	0.671157	0.792187	0.689456	0.554883	0.844745	0.775612	0.729382	0.758009	0.610616	0.846859	0.75002	0.852807	0.621742	0.791142	0.887728	0.706853	0.917844	0.927151	0.843245	1	0.94862	0.930172	0.915206	0.945702	0.95394	0.932039	0.945813	0.913442	0.921769	0.967532	0.952208
ZC24h2	0.661479	0.658353	0.790089	0.72715	0.707873	0.756831	0.842343	0.77408	0.668311	0.874771	0.850706	0.804071	0.827442	0.70614	0.886362	0.814369	0.880274	0.690699	0.839915	0.885765	0.775452	0.904763	0.905357	0.817602	0.94862	1	0.944783	0.922235	0.956714	0.95356	0.930039	0.883738	0.848984	0.865292	0.896857	0.906667
ZC24h3	0.790796	0.785697	0.883044	0.826309	0.827066	0.858654	0.923015	0.874147	0.795301	0.953271	0.926471	0.90643	0.921191	0.836056	0.956539	0.913039	0.951005	0.762133	0.916667	0.92854	0.879309	0.94178	0.947971	0.764456	0.930172	0.944783	1	0.984031	0.961904	0.968732	0.977776	0.86453	0.835346	0.858749	0.912997	0.943354
ZC48h1	0.790307	0.78044	0.879974	0.817865	0.816562	0.855136	0.922837	0.870935	0.788506	0.954237	0.915988	0.900724	0.916613	0.835745	0.953119	0.913015	0.953525	0.76346	0.912749	0.923475	0.877015	0.925371	0.932168	0.747879	0.915206	0.922235	0.984031	1	0.969148	0.976686	0.98158	0.865108	0.82611	0.848893	0.905246	0.943476
ZC48h2	0.671398	0.665812	0.79436	0.756122	0.708267	0.753635	0.860165	0.801205	0.692412	0.909023	0.84992	0.821975	0.842781	0.731314	0.902548	0.834551	0.903858	0.683465	0.852106	0.878151	0.786104	0.90027	0.901536	0.778759	0.945702	0.956714	0.961904	0.969148	1	0.992743	0.977665	0.905408	0.882783	0.909737	0.927818	0.958925
ZC48h3	0.674467	0.666442	0.792668	0.743389	0.712416	0.75817	0.86116	0.793946	0.688348	0.908284	0.853368	0.824234	0.846332	0.736399	0.905846	0.836246	0.904115	0.691785	0.86085	0.899009	0.800095	0.917501	0.921813	0.791265	0.95394	0.95356	0.968732	0.976686	0.992743	1	0.976627	0.916342	0.891297	0.905639	0.939872	0.964404
ZC72h1	0.730257	0.723512	0.830724	0.807869	0.764126	0.80203	0.88831	0.836435	0.745747	0.937287	0.883794	0.861707	0.881687	0.780169	0.932502	0.880216	0.9346	0.720887	0.87629	0.892744	0.823718	0.920092	0.921734	0.765802	0.932039	0.930039	0.977776	0.98158	0.977665	0.976627	1	0.897016	0.876343	0.90362	0.935912	0.96618
ZC72h2	0.420348	0.410159	0.574259	0.529835	0.483648	0.555411	0.675781	0.560479	0.420403	0.741109	0.64759	0.599375	0.638282	0.480966	0.739722	0.628705	0.740468	0.556842	0.669066	0.781561	0.581669	0.894034	0.87665	0.883291	0.945813	0.883738	0.86453	0.865108	0.905408	0.916342	0.897016	1	0.968622	0.954454	0.969885	0.936096
ZC72h3	0.359714	0.353031	0.516366	0.500496	0.421407	0.48144	0.631771	0.51907	0.381546	0.703496	0.597565	0.550774	0.59218	0.434241	0.69466	0.578283	0.690159	0.458448	0.616115	0.735582	0.53008	0.841406	0.862129	0.819178	0.913442	0.848984	0.835346	0.82611	0.882783	0.891297	0.876343	0.968622	1	0.974222	0.964113	0.938205
ZC96h1	0.414887	0.410484	0.571989	0.56945	0.472602	0.529574	0.679156	0.581975	0.442044	0.753857	0.647765	0.60451	0.642445	0.488145	0.740736	0.630485	0.743115	0.495964	0.666755	0.749867	0.571708	0.841237	0.848066	0.804777	0.921769	0.865292	0.858749	0.848893	0.909737	0.905639	0.90362	0.954454	0.974222	1	0.9639	0.952461
ZC96h2	0.504547	0.49674	0.655537	0.621834	0.564611	0.626568	0.749343	0.648262	0.517488	0.818805	0.729622	0.688291	0.722176	0.574916	0.813628	0.713852	0.814702	0.590648	0.749989	0.851593	0.671964	0.915832	0.928689	0.845038	0.967532	0.896857	0.912997	0.905246	0.927818	0.939872	0.935912	0.969885	0.964113	0.9639	1	0.981393
ZC96h3	0.595807	0.59005	0.729202	0.708976	0.64908	0.698103	0.818524	0.739039	0.622302	0.87853	0.795396	0.763455	0.794142	0.666434	0.867851	0.786154	0.865666	0.644077	0.80723	0.870693	0.740087	0.922867	0.936896	0.813446	0.952208	0.906667	0.943354	0.943476	0.958925	0.964404	0.96618	0.936096	0.938205	0.952461	0.981393	1
